# Supplementary material for: Anisotropic and magnetic properties in non-metal and non-radical organic aggregates of tri-substituted phenyl derivatives
Source: Royal Society of Chemistry journal article supplement (doi:10.1039/c9nj02730k), 2019-11-22
Supplement: c9nj02730k1.pdf [file c9nj02730k1.pdf]

## Supporting Information

### **Anisotropic and magnetic properties in non-metal and non-radical organic aggregates of tri-substituted phenyl derivatives**

Nur Amanina Juniasari Tun Nur Iskandar,<sup>a</sup> Guan-Yeow Yeap,<sup>\*a</sup> Nobuyuki Maeta,<sup>b</sup> Masato M Ito,<sup>b</sup> Katarzyna Gas<sup>c</sup> and Maciej Sawicki<sup>c</sup>

*<sup>a</sup>Liquid Crystal Research Laboratory, School of Chemical Sciences, Universiti Sains Malaysia, 11800 Minden, Penang, Malaysia*

*<sup>b</sup>Faculty of Science & Engineering, Soka University, 1-236 Tangi-cho, Hachioji, Tokyo 192-8577, Japan*

*<sup>c</sup>Institute of Physics, Polish Academy of Science, Aleja Lotnikow 32/46 PL-02668, Warsaw, Poland*

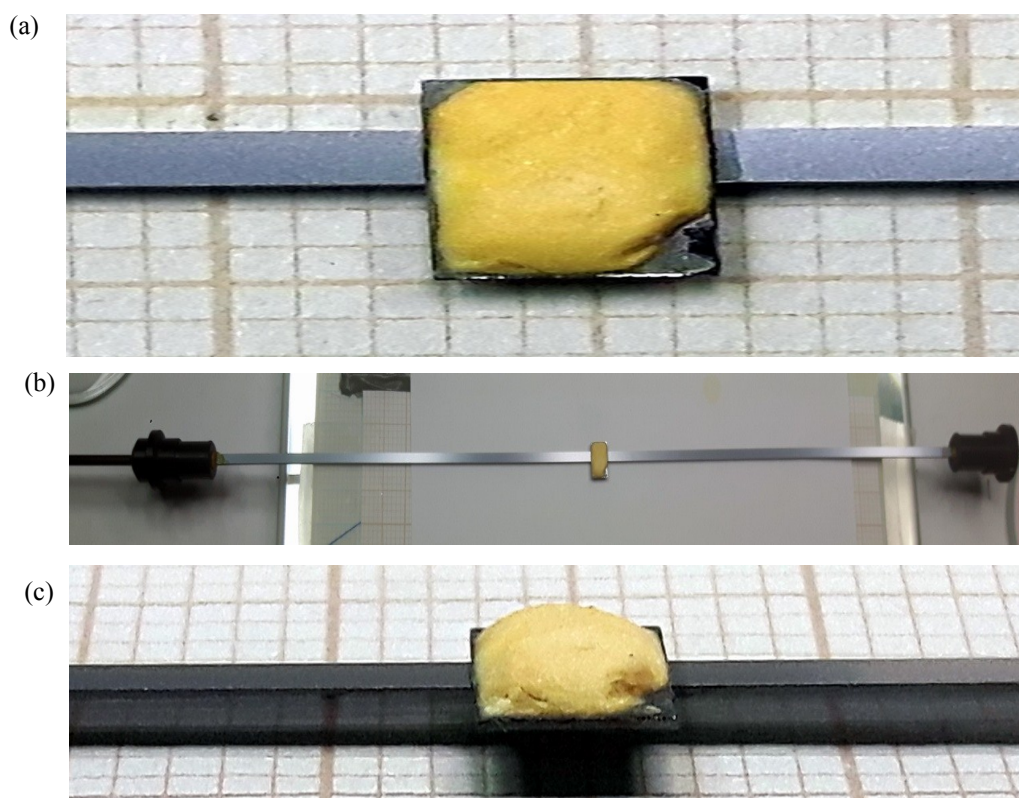

Figure 1. A strongly dilute GE-varnish were mixed with selective powder samples of (a) compound **3f**. (b) The mixtures were transferred into 5 x 4 x 0.15 mm<sup>3</sup> pieces of magnetically characterized silicon (Si).

## 1.0 General procedure for SQUID magnetometer measurement

## 2.0 Characterization

### 2.1 Magnetic behaviour

(a)

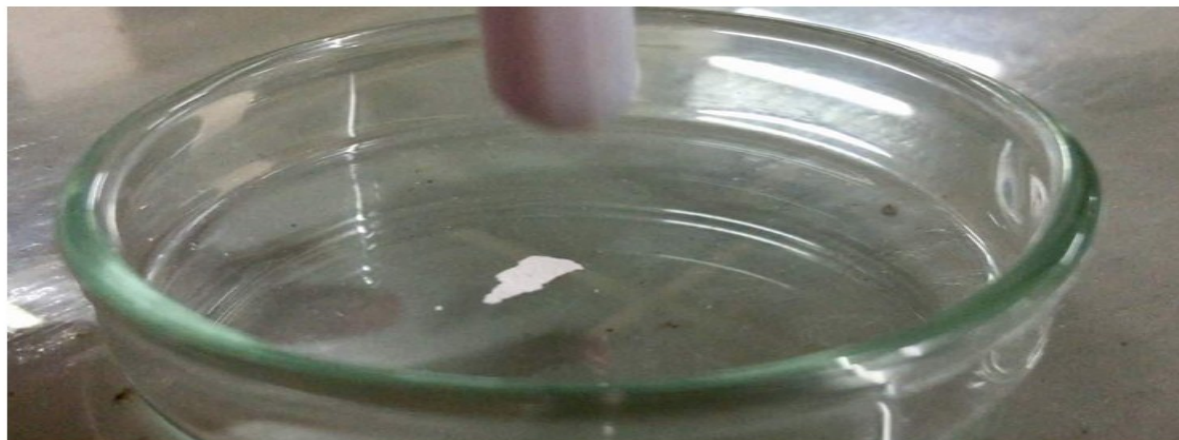

(b)

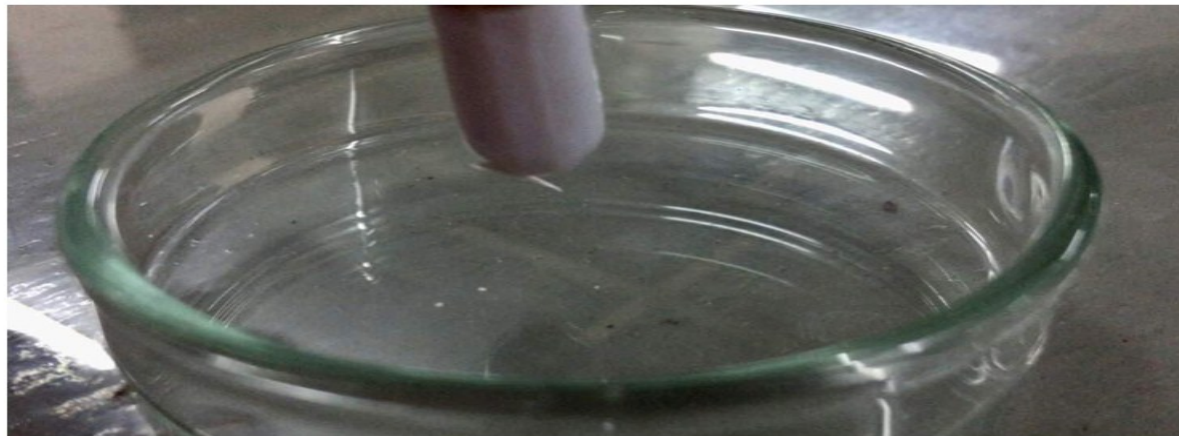

Figure 2. Photographs of the experimental setup for observing the solid sample of representative compound **3c** attracted by weak permanent magnet in a petri dish. (a) Before the magnet approached the solid sample and (b) photograph showing the attraction of the solid sample to the magnet.

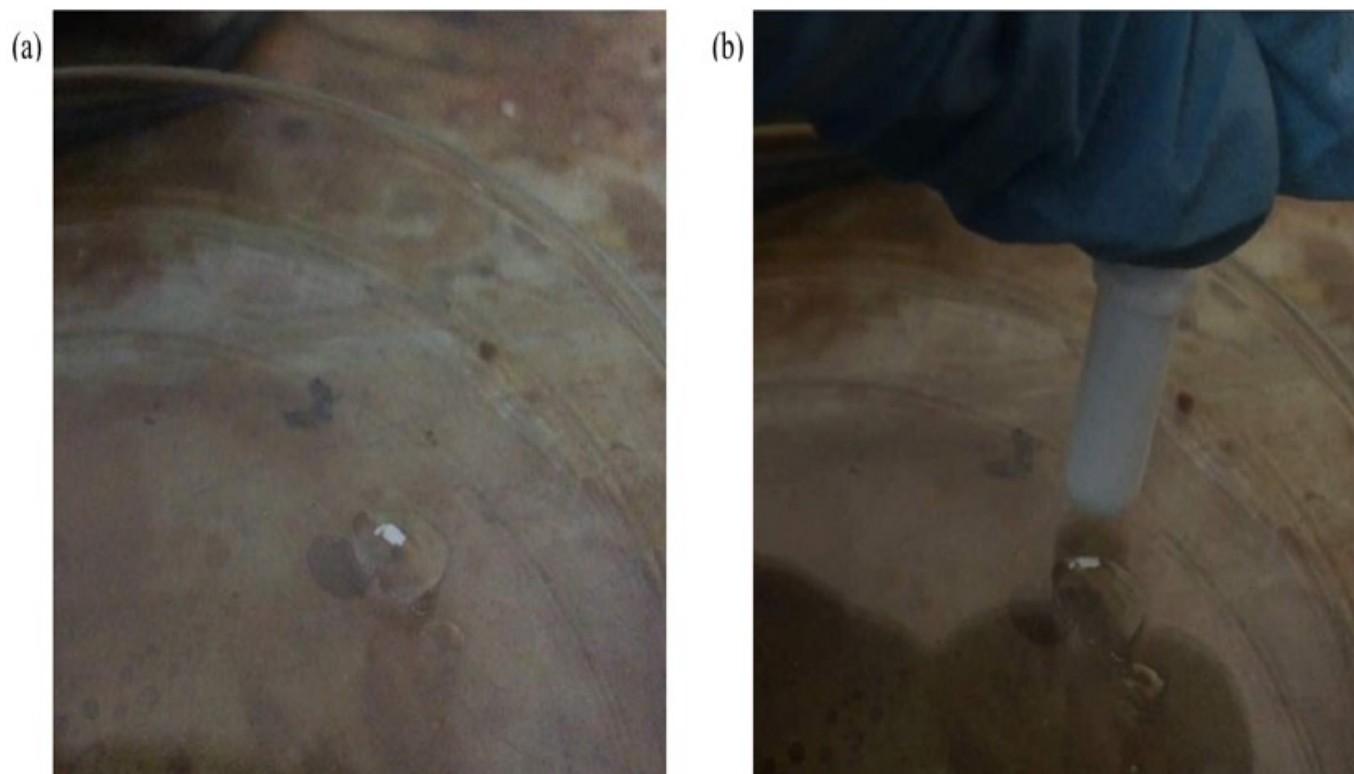

Figure 3. Schematic representation of the experimental setup for observing the attraction by a weak permanent magnet of representative compound **3c** on water surface at room temperature. (a) Solid sample is floating on the water at room temperature and (b) photograph displaying the solid sample moves towards the magnet.
